# Supplementary material for: Dielectric characterization of vegetation at L-band using an open-ended coaxial probe
Source: Copernicus journal article supplement (doi:10.5194/gi-2018-9), 2018-03-28
Supplement: Supplementary file 1 [file gi-2018-9-supplement.zip]

Archive with 7 entries (7 files):
- fS01.pdf
- fS02.pdf
- fS03.pdf
- fS04.pdf
- fS05.pdf
- fS06.pdf
- fS07.pdf
