# Supplementary material for: Dielectric characterization of vegetation at L-band using an open-ended coaxial probe
Source: Copernicus journal article supplement (doi:10.5194/gi-2018-9), 2018-03-28
Supplement: Supplementary file 1 [file gi-2018-9-supplement.zip › fS04.pdf]

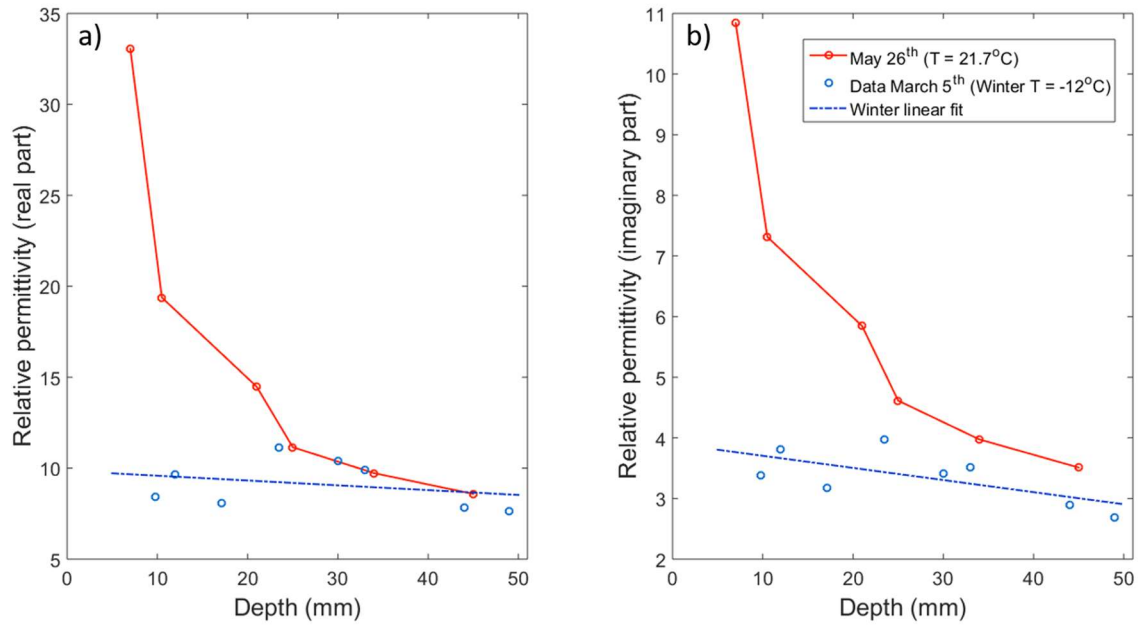

**Figure S4: Trunk radial profile of the real (a) and imaginary (b) relative permittivity in L-band of black cherry at the SIRENE station at the Université de Sherbrooke. The winter data were always collected well below freezing point.**
