# Supplementary material for: Dielectric characterization of vegetation at L-band using an open-ended coaxial probe
Source: Copernicus journal article supplement (doi:10.5194/gi-2018-9), 2018-03-28
Supplement: Supplementary file 1 [file gi-2018-9-supplement.zip › fS05.pdf]

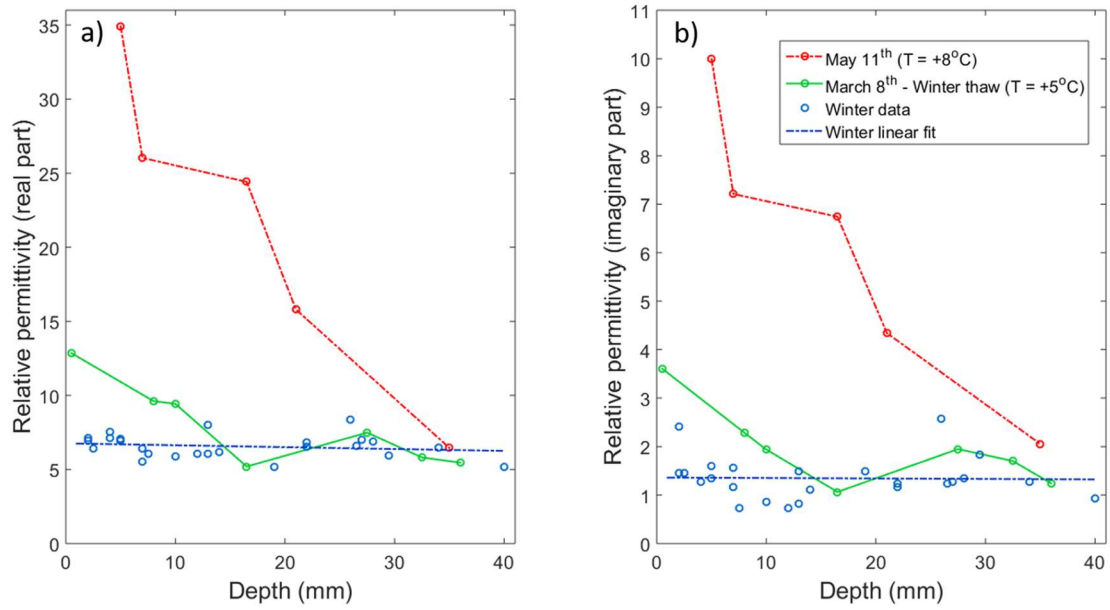

**Figure S5: Trunk radial profile of the real (a) and imaginary (b) relative permittivity (unitless) in L-band of red spruce at the Montmorency site in Québec. The winter data were always collected well below freezing point. The green data (March 8) corresponds to a short winter thaw event where air temperature went above 0°C during daytime.**
