# Supplementary material for: Dielectric characterization of vegetation at L-band using an open-ended coaxial probe
Source: Copernicus journal article supplement (doi:10.5194/gi-2018-9), 2018-03-28
Supplement: Supplementary file 1 [file gi-2018-9-supplement.zip › fS06.pdf]

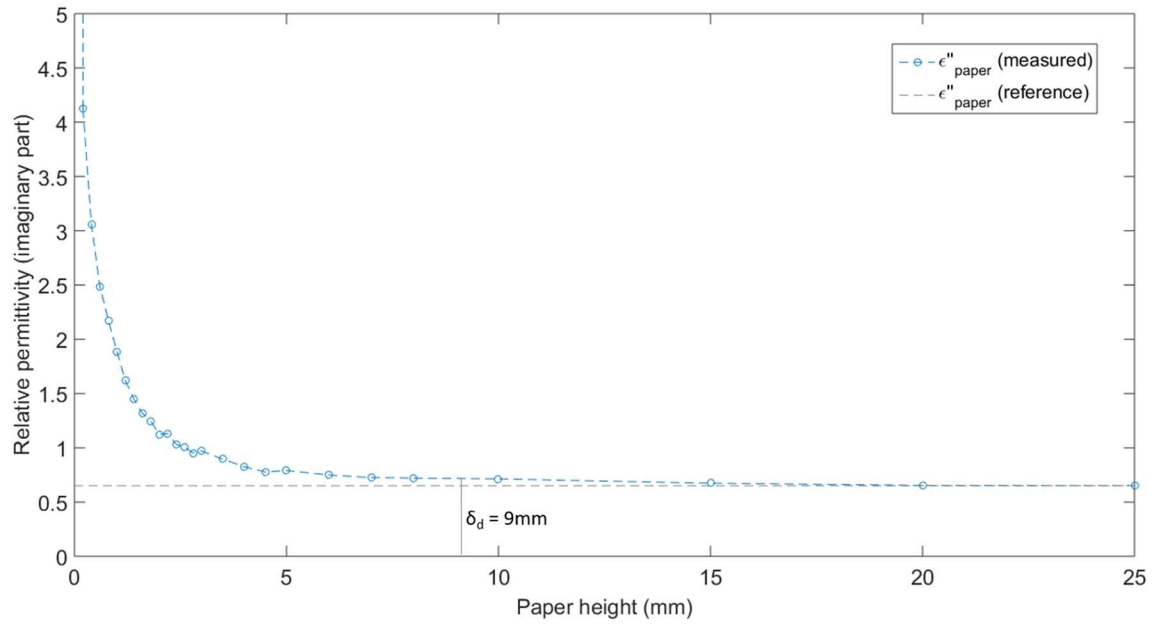

**Figure S6: Imaginary relative permittivity in L-band of a stack of paper sheets.  $\delta_d$  is the penetration depth.**
